# Supplementary material for: Water extractable organic matter (WEOM) as an indicator of granular activated carbon (GAC) bed life and water quality outcomes in drinking water treatment
Source: Royal Society of Chemistry journal article supplement (doi:10.1039/c9ew00303g), 2019-01-01
Supplement: c9ew00303g1.xlsx [file c9ew00303g1.xlsx]

## Sheet: Water samples
Sample	DOC mg/l	pH	UV254 (AU)	Br (ppm)	% DOC removal	TTHM (ug/l)	%TTHM removal
Influent	1.18926	7.32	0.1	0.0413153	-	21.1615
Influent	1.23387	7.46	0.106	0.0413153	-	20.1751
Influent	1.32945	7.45	0.099	0.0912163	-	19.6978
1	0.770516	6.83	0.054	0.128792	0.38401	13.9795	0.312868
1	0.792818	6.87	0.052	0.0890727	0.366181	12.3761	0.391684
1	0.811403	6.31	0.045	0.122361	0.351323	12.5027	0.385457
2	0.918346	6.88	0.065	0.04	0.265827	15.8689	0.22
2	0.905177	6.83	0.057	0.04	0.276355	14.164	0.3038
2	0.881601	7	0.061	0.0950295	0.295203	15.7524	0.225729
3	0.10358	7	0.008	0.0413153	0.917193	7.86457	0.613435
3	0.106341	7.01	0.009	0.0413153	0.914985	9.82886	0.516886
3	0.103792	7	0.008	0.0413153	0.917023	8.26345	0.59383
4	0.952861	6.9	0.073	0.0413153	0.238234	14.5868	0.283021
4	1.42927	6.93	0.076	0.04	-0.142635	20.2629	0.00402451
4	0.956472	6.93	0.07	0.0413153	0.235347	17.8821	0.121047
5	0.998315	6.82	0.08	0.04	0.201896	15.8903	0.218951
5	0.955091	8.86	0.074	0.0413153	0.236451	16.3473	0.196488
5	1.04908	6.89	0.077	0.148084	0.161313	14.616	0.281584

## Sheet: GAC samples
		CWEOM									HWEOM								30 min CWEOM
Bed	Height	Replicate	Sample weight (g)	TOC (mg/l)	OC (mg)	OC (mg/g)			Bed	Height	Replicate	Sample weight (g)	TOC (mg/l)	OC (mg)	OC (mg/g)			Bed	Height	Replicate	Sample weight (g)	TOC (mg/l)	OC (mg)	oc (mg/g)	UV254
1	Top	A	4.004	11.3696	1.13696	0.283955			1	Top	A	1.991	7.19519	0.719519	0.361386			1	Bottom	A	2.006	3.25994	0.325753	0.162389	0.056
		B	4.074	9.63642	0.963642	0.236535					B	2.001	6.28576	0.628576	0.314131			1	Bottom	B	1.991	2.82636	0.283122	0.142201	0.045
	Middle	A	4.008	7.20117	0.720117	0.17967				Middle	A	2.003	4.5257	0.45257	0.225946			1	Mid	A	1.999	3.1983	0.319193	0.159676	0.044
		B	4.046	10.144	1.0144	0.250717					B	1.999	6.27615	0.627615	0.313964			1	Mid	B	1.998	3.75568	0.377037	0.188707	0.06
	Bottom	A	3.98	7.04784	0.704784	0.177081				Bottom	A	2	4.76721	0.476721	0.238361			1	Top	A	1.993	5.50619	0.547739	0.274832	0.05
		B	4.082	6.17546	0.617546	0.151285					B	2.003	4.23609	0.423609	0.211487			1	Top	B	1.991	4.5356	0.449115	0.225573	-
2	Top	A	4.008	13.0932	1.30932	0.326676			2	Top	A	1.995	7.60768	0.760768	0.381338			2	Bottom	A	2.001	3.27665	0.32873	0.164283	0.059
		B	4.084	13.1566	1.31566	0.32215					B	2	7.75088	0.775088	0.387544			2	Bottom	B	1.993	3.44173	0.345075	0.173143	0.042
	Middle	A	4.052	13.4633	1.34633	0.332262				Middle	A	1.997	7.56921	0.756921	0.379029			2	Mid	A	2.003	4.17307	0.41762	0.208497	-
		B	3.994	7.75314	0.775314	0.19412					B	1.997	6.80299	0.680299	0.340661			2	Mid	B	1.995	5.61067	0.560034	0.280719	0.065
	Bottom	A	4.044	6.63756	0.663756	0.164133				Bottom	A	2.003	5.08674	0.508674	0.253956			2	Top	B	1.997	5.05694	0.507125	0.253943	0.117
		B	4.079	7.11234	0.711234	0.174365					B	2.005	5.47038	0.547038	0.272837			2	Top	A	2.007	5.5604	0.555534	0.276798	-
3	Top	A	3.985	0.568231	0.0568231	0.0142592			3	Top	A	1.998	0.851251	0.0851251	0.0426052			3	Bottom	B	2.005	0.484668	0.0487295	0.024304	0.018
		B	4.049	0.896774	0.0896774	0.022148					B	1.999	0.893784	0.0893784	0.0447115			3	Bottom	A	2.002	0.46947	0.046931	0.0234421	0.01
	Middle	A	3.995	1.06068	0.106068	0.0265501				Middle	A	1.998	0.93514	0.093514	0.0468038			3	Mid	A	2.008	1.10667	0.110799	0.0551787	0.009
		B	4.031	0.569817	0.0569817	0.0141359					B	1.998	0.691061	0.0691061	0.0345876			3	Mid	A	2.002	0.689904	0.0688635	0.0343973	0.013
	Bottom	A	4.085	0.512716	0.0512716	0.0125512				Bottom	A	2	0.50939	0.050939	0.0254695			3	Top	B	2.003	0.906389	0.0911546	0.045509	0.014
		B	4.054	0.592974	0.0592974	0.0146269					B	2.001	0.632606	0.0632606	0.0316145			3	Top	A	2.007	0.665988	0.0667719	0.0332695	0.013
4	Top	A	4.026	16.4452	1.64452	0.408475			4	Top	A	2	9.18394	0.918394	0.459197			4	Bottom	A	2.01	8.21645	0.820207	0.408063	0.161
		B	3.981	11.1158	1.11158	0.27922					B	1.994	6.46423	0.646423	0.324184			4	Bottom	B	2	5.57846	0.562058	0.281029	0.173
	Middle	A	3.994	15.8425	1.58425	0.396657				Middle	A	1.997	7.29457	0.729457	0.365276			4	Mid	A	2.005	5.9207	0.58937	0.29395	0.14
		B	4.027	17.693	1.7693	0.439359					B	2.006	10.3445	1.03445	0.515678			4	Mid	B	2.007	6.17685	0.617981	0.307913	0.15
	Bottom	A	4.089	16.3923	1.63923	0.400889				Bottom	A	1.991	7.39823	0.739823	0.371584			4	Top	B	1.999	4.41963	0.442825	0.221523	0.134
		B	4.03	17.3229	1.73229	0.429848					B	2.002	6.62773	0.662773	0.331056			4	Top	A	2.001	6.51058	0.657842	0.328757	0.109
5	Top	A	3.99	13.7065	1.37065	0.343521			5	Top	A	1.995	6.00578	0.600578	0.301042			5	Bottom	A	2.003	4.46992	0.446008	0.22267	0.103
		B	4.021	12.9028	1.29028	0.320886					B	2.001	6.26973	0.626973	0.31333			5	Bottom	B	1.997	3.84603	0.388014	0.194298	0.114
	Middle	A	4.069	14.3938	1.43938	0.353743				Middle	A	2.008	6.13402	0.613402	0.305479			5	Mid	A	1.992	5.18946	0.517037	0.259557	0.137
		B	4.053	8.35059	0.835059	0.206035					B	2.007	3.66864	0.366864	0.182792			5	Mid	B	1.99	2.52384	0.252417	0.126843	0.067
	Bottom	A	4.07	11.3484	1.13484	0.278831				Bottom	A	2.002	5.41054	0.541054	0.270257			5	Top	A	2.005	5.40841	0.541701	0.270175	0.106
		B	4.069	13.3575	1.33575	0.328275					B	2.003	6.74956	0.674956	0.336972			5	Top	B	2.005	5.34995	0.533438	0.266054	0.125
